# Supplementary material
Source: Research Square preprint supplement (doi:10.21203/rs.3.rs-9103637/v1)
Supplement: Supplementary file 1 [file 46eab0f558d549f8968395a9.docx]

**Table 2.** Oral intake and voiding’s effect on primary outcomes.

|  | **1st Baseline measurement** | **2nd Baseline measurement** | **Baseline**  **mean** | **After fluid intake**  **(500 mL)** | **Voiding**  **(mean 200 mL)** |
| --- | --- | --- | --- | --- | --- |
|  | **Mean (SD)** | **Mean (SD)** | **Mean (SD)** | **Mean (SD)** | **Mean (SD)** |
| **Weight (kg)** | 76.8 (17) | 76.2 (18) | 76.5 (18) | 77.3 (18) * | 77.0 (18) * |
| **Resistance (ohm)** | 601 (100) | 595 (84) | 597 (88) | 602 (92) * | 600 (89) * |
| **Reactance (ohm)** | 58 (9) | 58 (7) | 59 (8) | 60 (9) * | 59 (8) * |
| **PhA (o)** | 5.6 (0.8) | 5.7 (0.7) | 5.7 (0.7) | 5.8 (0.9) * | 5.7 (0.7) |
| **FFM (kg)** | 55 (13) | 55 (13) | 55 (13) | 55 (13) | 55 (13) |
| **FM (kg)** | 22 (11) | 22 (12) | 22 (12) | 22 (12) * | 21 (11) |
