# Supplementary material
Source: Research Square preprint supplement (doi:10.21203/rs.3.rs-9103637/v1)
Supplement: Supplementary file 2 [file af2399f7cb3104554c2bd656.docx]

**Table 3.** Predictors effect on BIA measurements.

| **Predictors** |  | **No. (%)** | **Unadjusted mean weight (95% CI), kg** | **P** | **Adjusted mean weight (95% Cl), kg** | **P** |
| --- | --- | --- | --- | --- | --- | --- |
| **Fasting** | Yes  No  Difference | 5  24 | 79 (56 to 102)  76 (68 to 83)  3 (-15 to 22) | 0.699 |  |  |
| **Sex** | Woman  Man  Difference | 19  10 | 70 (61 to 78)  88 (78 to 97)  -19 (-31 to -6) | <0.007* | 0.01 (-0.01 to 0.03) | 0.597 |
| **Fluid intake throughout the day** | <1000 ml  >1000 ml  Difference | 17  12 | 75 (64 to 86)  78 (69 to 87)  3 (-11 to 18) | 0.626 |  |  |
| **Time of measurement** | Morning  Afternoon  Difference | 10  19 | 80 (62 to 99)  74 (67 to 80)  -7 (-21 to 8) | 0.364 |  |  |
| **Time between 3. and 4. Measurement**** | <22.5  >22.5  Difference | 27  4 | 76 (70 to 83)  82 (46 to 117)  5 (-15 to 25) | 0.596 |  |  |

* p < 0.05

** After fluid intake weight
