# Supplementary material
Source: Research Square preprint supplement (doi:10.21203/rs.3.rs-9103637/v1)
Supplement: Supplementary file 3 [file ccdc13f261f258a3207acdbc.docx]

**Tabel 1.**

|  | **Women (n = 19)** | | **Men (n = 12)** | |
| --- | --- | --- | --- | --- |
|  | **Mean (SD)** | **Range** | **Mean (SD)** | **Range** |
| **Age (years)** | 32 (11) | 23 – 61 | 36 (12) | 21 – 52 |
| **Height (cm)** | 168 (5) | 154 – 175 | 182 (8) | 168 – 195 |
| **Body weight (kg)** | 69.8 (17) | 58 – 134 | 87.8 (12) | 74 – 114 |
| **BMI (kg/m2)** | 25 (6) | 20 – 44 | 27 (3) | 23 – 32 |
